# Supplementary material for: A conserved MADS-box phosphorylation motif regulates differentiation and mitochondrial function in skeletal, cardiac, and smooth muscle cells
Source: PubMed Central journal article supplement (PMC5399178; doi:10.1038/cddis.2015.306), 2015-10-29

Supplemental Figure 1.

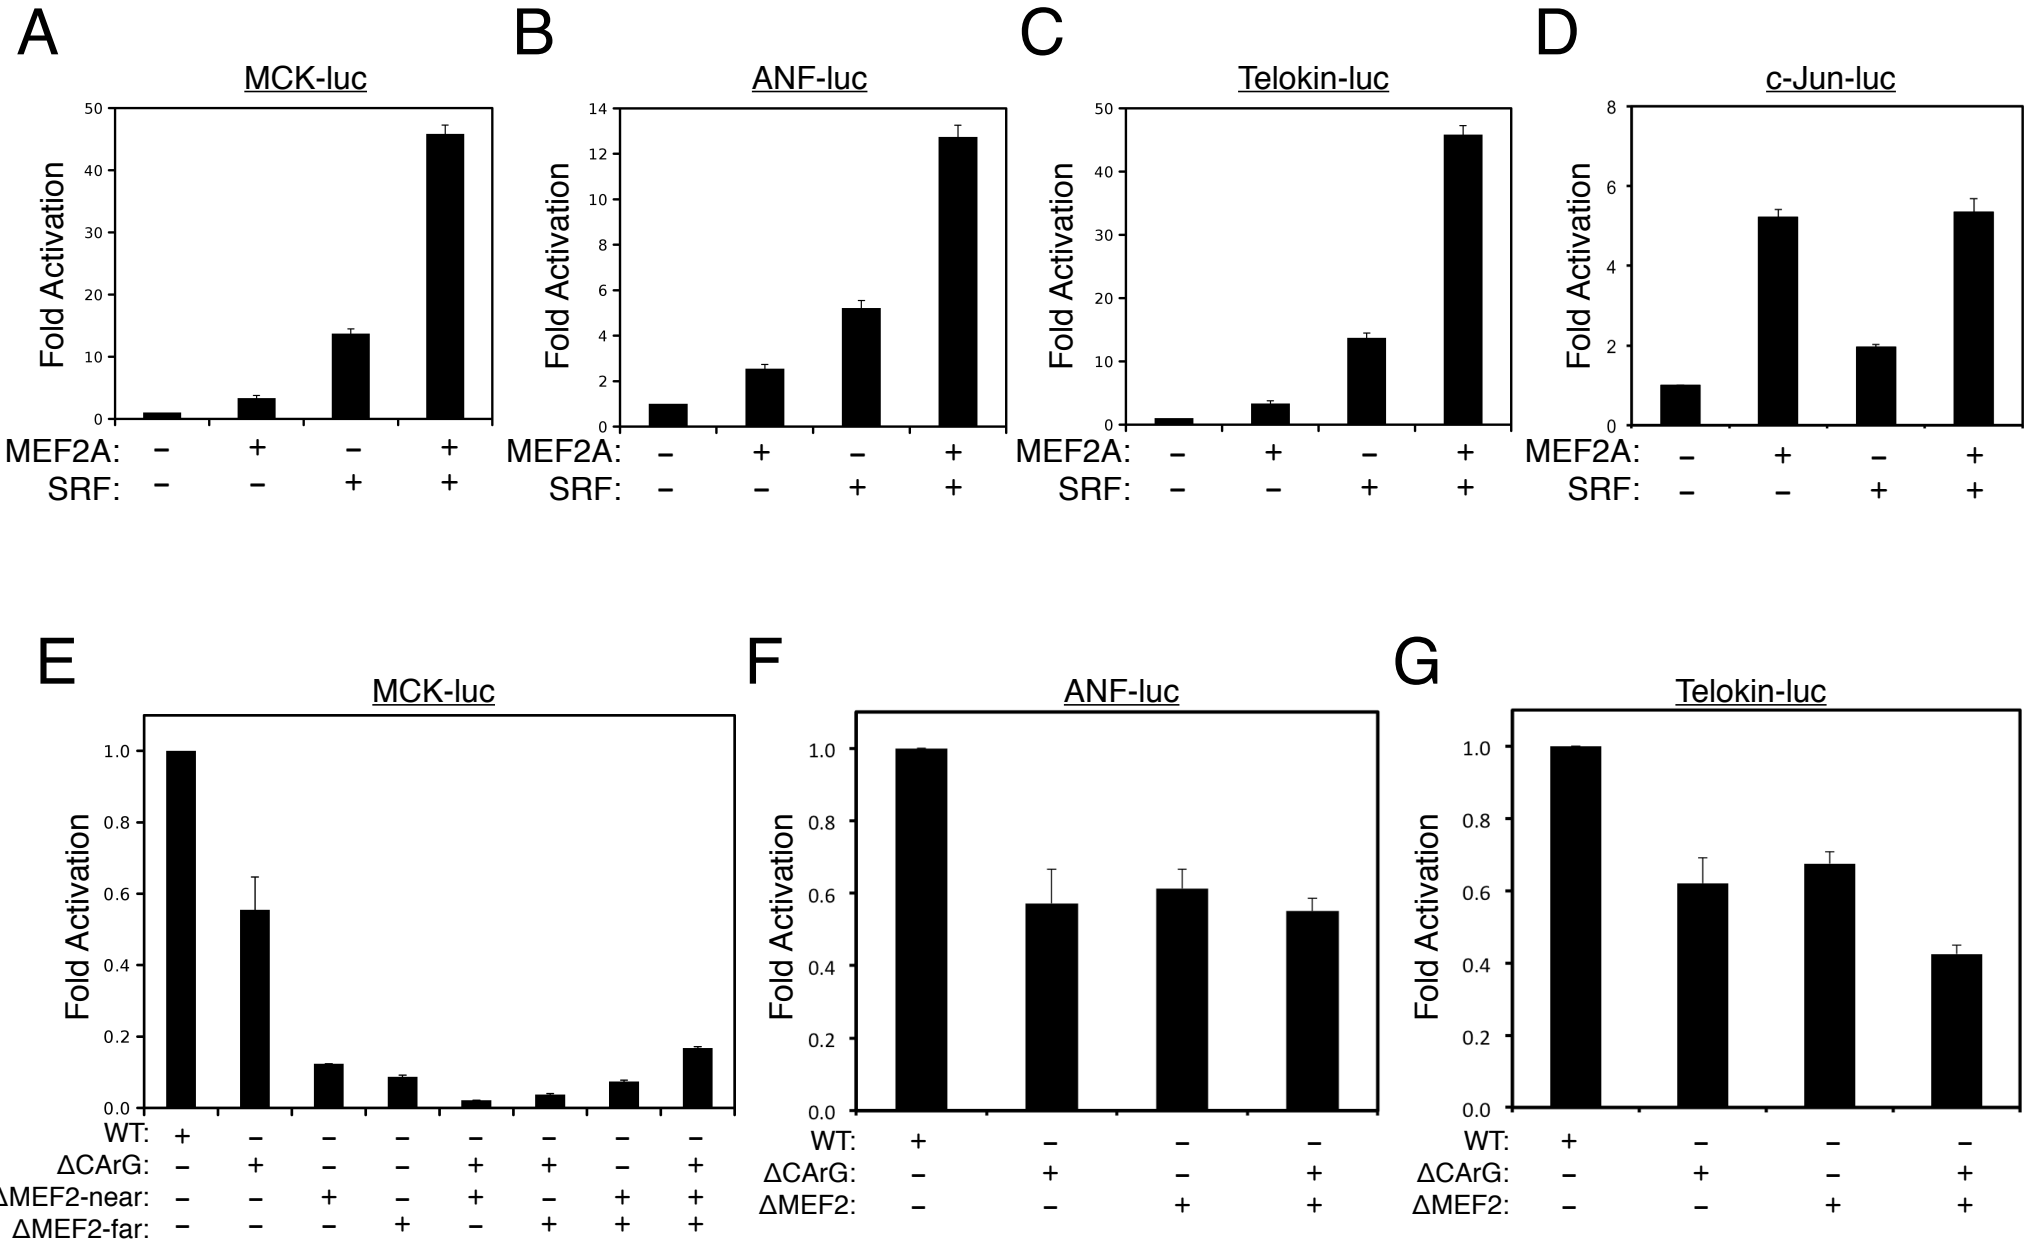

Supplement: cddis2015306x2.pdf [file cddis2015306x2.pdf]
