# Supplementary material for: A conserved MADS-box phosphorylation motif regulates differentiation and mitochondrial function in skeletal, cardiac, and smooth muscle cells
Source: PubMed Central journal article supplement (PMC5399178; doi:10.1038/cddis.2015.306), 2015-10-29

**A**

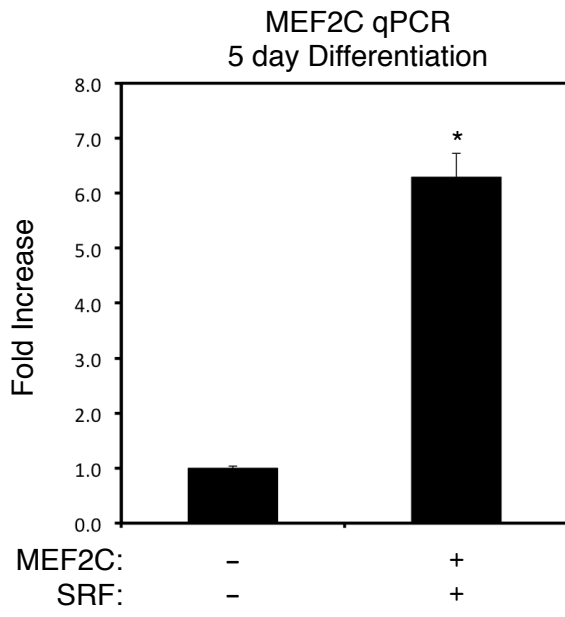

**B**

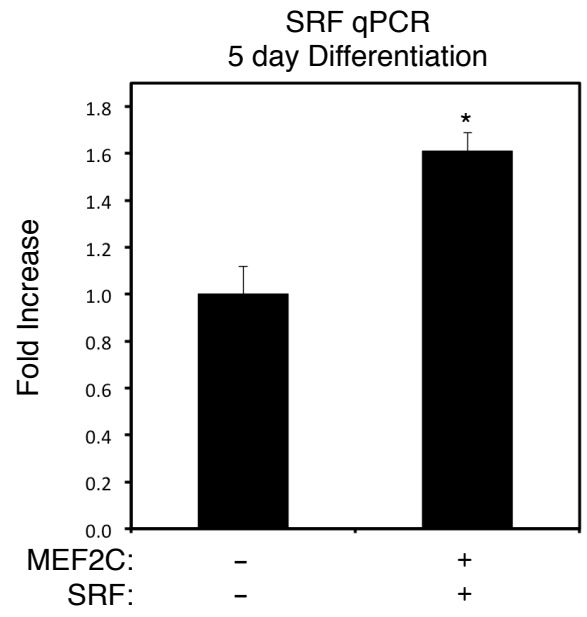

**C**

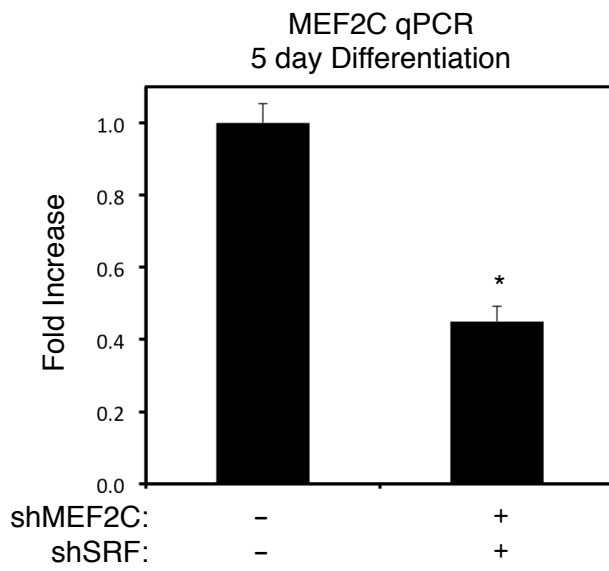

**D**

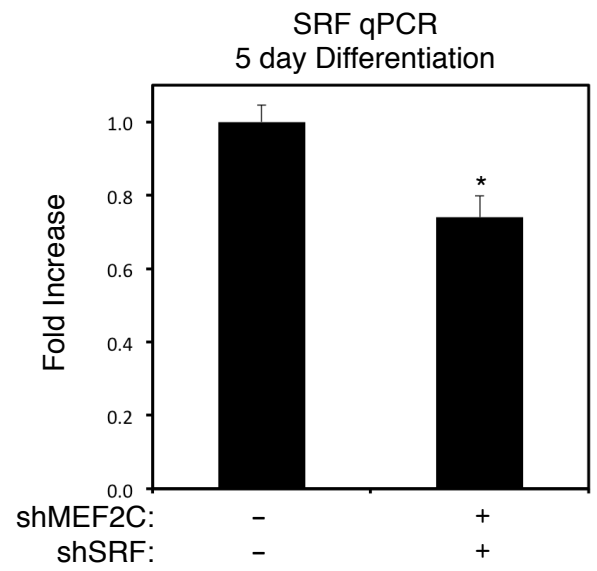

Supplement: cddis2015306x3.pdf [file cddis2015306x3.pdf]
