# Supplementary material for: A conserved MADS-box phosphorylation motif regulates differentiation and mitochondrial function in skeletal, cardiac, and smooth muscle cells
Source: PubMed Central journal article supplement (PMC5399178; doi:10.1038/cddis.2015.306), 2015-10-29
Supplement: cddis2015306x5.pdf [file cddis2015306x5.pdf]

Table 1.

|                                               |           |
|-----------------------------------------------|-----------|
| <b>PPARA (M00242):</b>                        |           |
| Aldolase 1, A                                 | NM_007438 |
| Creatine kinase, mitochondrial 2              | NM_198415 |
| Ryanodine receptor 2, cardiac                 | NM_023868 |
| Troponin I, skeletal slow                     | NM_021467 |
| Calsequestrin 2                               | NM_009814 |
| Actin-binding Rho activating protein          | NM_175456 |
| Syntropin, acidic 1                           | NM_009228 |
| Myosin-binding protein C, cardiac             | NM_008653 |
| Integrin beta 2-like                          | NM_008405 |
| Myosin, heavy polypeptide II, smooth muscle   | NM_013607 |
|                                               |           |
| <b>NF-AT (M00302):</b>                        |           |
| Aldolase 1, A                                 | NM_007438 |
| Vasoactive intestinal peptide, Vip            | NM_011702 |
| Troponin I, skeletal slow                     | NM_021467 |
| Calsequestrin 2                               | NM_009814 |
| Hemochromatosis type 2                        | NM_027126 |
| Actin-binding Rho activating protein          | NM_175456 |
| Syntropin, acidic 1                           | NM_009228 |
| Sodium channel, voltage-gated, type VII alpha | NM_009135 |
| Myosin-binding protein C, cardiac             | NM_008653 |
| Integrin beta 2-like                          | NM_008405 |
| Myosin, heavy polypeptide II, smooth muscle   | NM_013607 |
|                                               |           |
| <b>STATx (M00223):</b>                        |           |
| Aldolase 1, A                                 | NM_007438 |
| Creatine kinase, mitochondrial 2              | NM_198415 |
| Troponin I, skeletal slow                     | NM_021467 |
| Caldesmon 1                                   | NM_145575 |
| Calsequestrin 2                               | NM_009814 |
| Hemochromatosis type 2                        | NM_027126 |
| Sodium channel, voltage-gated, type VII alpha | NM_009135 |
| Integrin beta 2-like                          | NM_008405 |
|                                               |           |
| <b>MYF (Wasserman-Fickett PWM):</b>           |           |
| Aldolase 1, A                                 | NM_007438 |
| Ryanodine receptor 2, cardiac                 | NM_023868 |
| Troponin I, skeletal slow                     | NM_021467 |
| Calsequestrin 2                               | NM_009814 |
| Hemochromatosis type 2                        | NM_027126 |

|                                                      |           |
|------------------------------------------------------|-----------|
| Syntropin, acidic 1                                  | NM_009228 |
| Potassium voltage-gated channel Kcnb 1               | NM_008420 |
| Sodium channel, voltage-gated, type VII alpha        | NM_009135 |
| Myosin-binding protein C, cardiac                    | NM_008653 |
|                                                      |           |
| <b>NKX 6.1 (M00424):</b>                             |           |
| Ryanodine receptor 2, cardiac                        | NM_023868 |
| Troponin I, skeletal slow                            | NM_021467 |
| Hemochromatosis type 2                               | NM_027126 |
| Actin-binding Rho activating protein                 | NM_175456 |
| Cholinergic receptor, nicotinic, alpha polypeptide 1 | NM_007389 |
| Potassium voltage-gated channel Kcnb 1               | NM_008420 |
| Sodium channel, voltage-gated, type VII alpha        | NM_009135 |
| Integrin beta 2-like                                 | NM_008405 |
| Myosin, heavy polypeptide II, smooth muscle          | NM_013607 |
|                                                      |           |
| <b>SRF (Wasserman-Fickett PWM):</b>                  |           |
| Creatine kinase, mitochondrial 2                     | NM_198415 |
| Caldesmon 1                                          | NM_145575 |
| Calsequestrin 2                                      | NM_009814 |
| Actin-binding Rho activating protein                 | NM_175456 |
| Cholinergic receptor, nicotinic, alpha polypeptide 1 | NM_007389 |
| Myosin-binding protein C, cardiac                    | NM_008653 |
| Integrin beta 2-like                                 | NM_008405 |
| Myosin, heavy polypeptide II, smooth muscle          | NM_013607 |
|                                                      |           |
| <b>POU3F2 (M00464):</b>                              |           |
| Ryanodine receptor 2, cardiac                        | NM_023868 |
| Vasoactive intestinal peptide, Vip                   | NM_011702 |
| Actin-binding Rho activating protein                 | NM_175456 |
| Cholinergic receptor, nicotinic, alpha polypeptide 1 | NM_007389 |
| Potassium voltage-gated channel Kcnb 1               | NM_008420 |
| Sodium channel, voltage-gated, type VII alpha        | NM_009135 |
