# Supplementary material for: A conserved MADS-box phosphorylation motif regulates differentiation and mitochondrial function in skeletal, cardiac, and smooth muscle cells
Source: PubMed Central journal article supplement (PMC5399178; doi:10.1038/cddis.2015.306), 2015-10-29
Supplement: cddis2015306x6.pdf [file cddis2015306x6.pdf]

**Table 2.**

| Identified Diacylglycerols                                                          |
|-------------------------------------------------------------------------------------|
| DG(P-14:0/18:1(9Z))                                                                 |
| DG(20:4(5Z,8Z,11Z,14Z)/22:5(7Z,10Z,13Z,16Z,19Z)/0:0)[iso2]                          |
| DG(20:4(5Z,8Z,11Z,14Z)/22:5(7Z,10Z,13Z,16Z,19Z)/0:0)[iso2] ESI+175.0V 10.9305       |
| DG(20:2(11Z,14Z)/24:0/0:0)                                                          |
| DG(20:2(11Z,14Z)/24:0/0:0) ESI+175.0V 4.404857                                      |
| DG(P-14:0/18:1(9Z)) ESI+175.0V 14.152499                                            |
| DG(18:0/18:0/0:0) ESI+175.0V 14.587999                                              |
| DG(20:5(5Z,8Z,11Z,14Z,17Z)/22:5(7Z,10Z,13Z,16Z,19Z)/0:0)[iso2] ESI+175.0V 16.466599 |
| DG(20:3(5Z,8Z,11Z)/22:6(4Z,7Z,10Z,13Z,16Z,19Z)/0:0)                                 |
| DG(20:4(5Z,8Z,11Z,14Z)/22:5(7Z,10Z,13Z,16Z,19Z)/0:0)[iso2] ESI+175.0V 10.931        |
| DG(20:4(5Z,8Z,11Z,14Z)/22:5(7Z,10Z,13Z,16Z,19Z)/0:0)[iso2] ESI+175.0V 10.930333     |
| DG(20:5(5Z,8Z,11Z,14Z,17Z)/22:5(7Z,10Z,13Z,16Z,19Z)/0:0)[iso2] ESI+175.0V 16.456    |
| DG(20:4(5Z,8Z,11Z,14Z)/22:5(7Z,10Z,13Z,16Z,19Z)/0:0)[iso2] ESI+175.0V 14.584        |
| DG(20:5(5Z,8Z,11Z,14Z,17Z)/22:5(7Z,10Z,13Z,16Z,19Z)/0:0)[iso2] ESI+175.0V 16.458334 |
| DG(20:5(5Z,8Z,11Z,14Z,17Z)/22:5(7Z,10Z,13Z,16Z,19Z)/0:0)[iso2] ESI+175.0V 16.459    |
| DG(21:0/22:4(7Z,10Z,13Z,16Z)/0:0)[iso2] ESI+175.0V 3.993333                         |
| DG(21:0/22:4(7Z,10Z,13Z,16Z)/0:0)[iso2] ESI+175.0V 3.981                            |
| DG(20:1(11Z)/21:0/0:0)[iso2]                                                        |
| DG(O-16:0/18:1(9Z)) ESI+175.0V 4.8475                                               |
| DG(21:0/22:4(7Z,10Z,13Z,16Z)/0:0)[iso2]                                             |
| DG(21:0/22:4(7Z,10Z,13Z,16Z)/0:0)[iso2] ESI+175.0V 3.9785                           |
| DG(20:2(11Z,14Z)/22:0/0:0)[iso2]                                                    |
| DG(20:5(5Z,8Z,11Z,14Z,17Z)/22:5(7Z,10Z,13Z,16Z,19Z)/0:0)[iso2]                      |
| DG(18:0/18:0/0:0)                                                                   |
| DG(O-16:0/18:1(9Z))                                                                 |
| DG(18:0/18:0/0:0) ESI+175.0V 13.723                                                 |
| DG(20:5(5Z,8Z,11Z,14Z,17Z)/22:5(7Z,10Z,13Z,16Z,19Z)/0:0)[iso2] ESI+175.0V 16.465    |
| DG(20:4(5Z,8Z,11Z,14Z)/22:5(7Z,10Z,13Z,16Z,19Z)/0:0)[iso2] ESI+175.0V 11.043        |
| DG(20:2(11Z,14Z)/24:0/0:0) ESI+175.0V 4.355                                         |
| DG(P-14:0/18:1(9Z)) ESI+175.0V 12.860001                                            |
| DG(20:4(5Z,8Z,11Z,14Z)/22:5(7Z,10Z,13Z,16Z,19Z)/0:0)[iso2] ESI+175.0V 10.9305 :15   |
| DG(20:5(5Z,8Z,11Z,14Z,17Z)/22:5(7Z,10Z,13Z,16Z,19Z)/0:0)[iso2] ESI+175.0V 16.46     |
| DG(20:5(5Z,8Z,11Z,14Z,17Z)/22:5(7Z,10Z,13Z,16Z,19Z)/0:0)[iso2] ESI+175.0V 16.458    |
| DG(20:2(11Z,14Z)/24:0/0:0) ESI+175.0V 4.424                                         |
| DG(22:2(13Z,16Z)/20:1(11Z)/0:0)                                                     |
| DG(20:1(11Z)/22:1(13Z)/0:0)[iso2]                                                   |
| DG(18:0/18:0/0:0) ESI+175.0V 5.053                                                  |
| DG(18:1(11Z)/20:1(11Z)/0:0)                                                         |
| DG(P-14:0/18:1(9Z)) ESI+175.0V 15.0915                                              |
| DG(18:1(9Z)/19:0/0:0)[iso2]                                                         |
| DG(21:0/22:3(10Z,13Z,16Z)/0:0)[iso2] ESI+175.0V 14.599                              |
| DG(20:2(11Z,14Z)/24:0/0:0) ESI+175.0V 4.455                                         |
| DG(P-14:0/18:1(9Z)) ESI+175.0V 12.841                                               |
| DG(20:4(5Z,8Z,11Z,14Z)/22:5(7Z,10Z,13Z,16Z,19Z)/0:0)[iso2] ESI+175.0V 11.003        |
